# Supplementary material for: Designed molecular propellers based on tetraarylterephthalamide and their chiroptical properties induced by biased helicity through transmission of point chirality
Source: Royal Society of Chemistry journal article supplement (doi:10.1039/b808936a), 2008-01-01
Supplement: b808936a.pdf [file b808936a.pdf]

## Supplementary Material

### Designed Molecular Propellers Based on Tetraaryltetraphthalamide and their Chiroptical Properties Induced by Biased Helicity through Transmission of Point Chirality

by Ryo Katoono, Hidetoshi Kawai, Kenshu Fujiwara and Takanori Suzuki\*

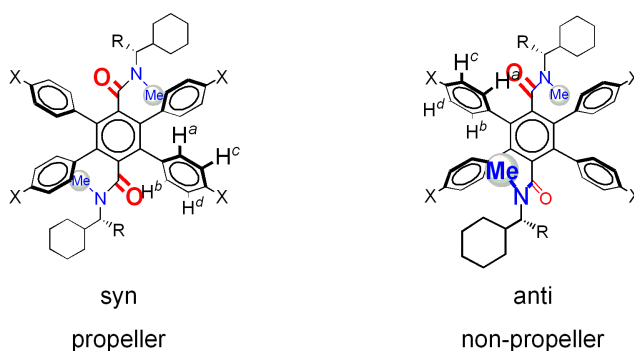

[1 : X = OMe, 2 : X = *p*-MeO-C<sub>6</sub>H<sub>4</sub>, a : R = H, b : R = Me]

**Supplementary Figures and Table**

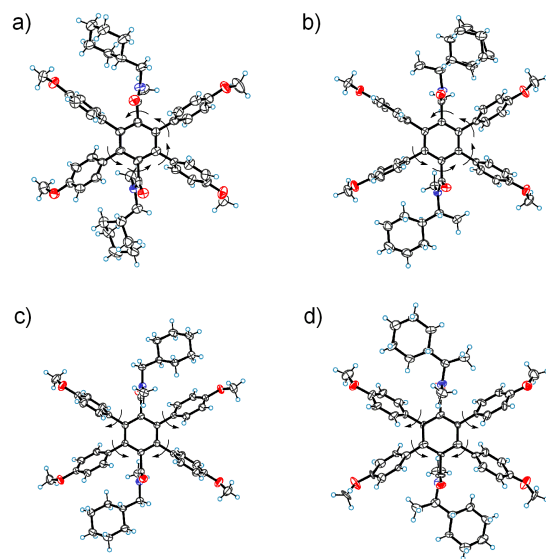

**Fig. S1** X-ray structures of a) syn-**1a** ( $P-1$ ,  $Z = 2$ ), b) ( $R,R$ )-syn-**1b** ( $P1$ ,  $Z = 1$ ), c) anti-**1a** ( $P-1$ ,  $Z = 1$ ), and d) ( $R,R$ )-anti-**1b** ( $P1$ ,  $Z = 1$ ) measured at  $-120$  °C, respectively. One of the aryl blades in a) and b) is almost perpendicular to the central core. The solvated benzene molecule in the crystal in c) is omitted for clarity. Thermal ellipsoids are shown at 50% probability level.

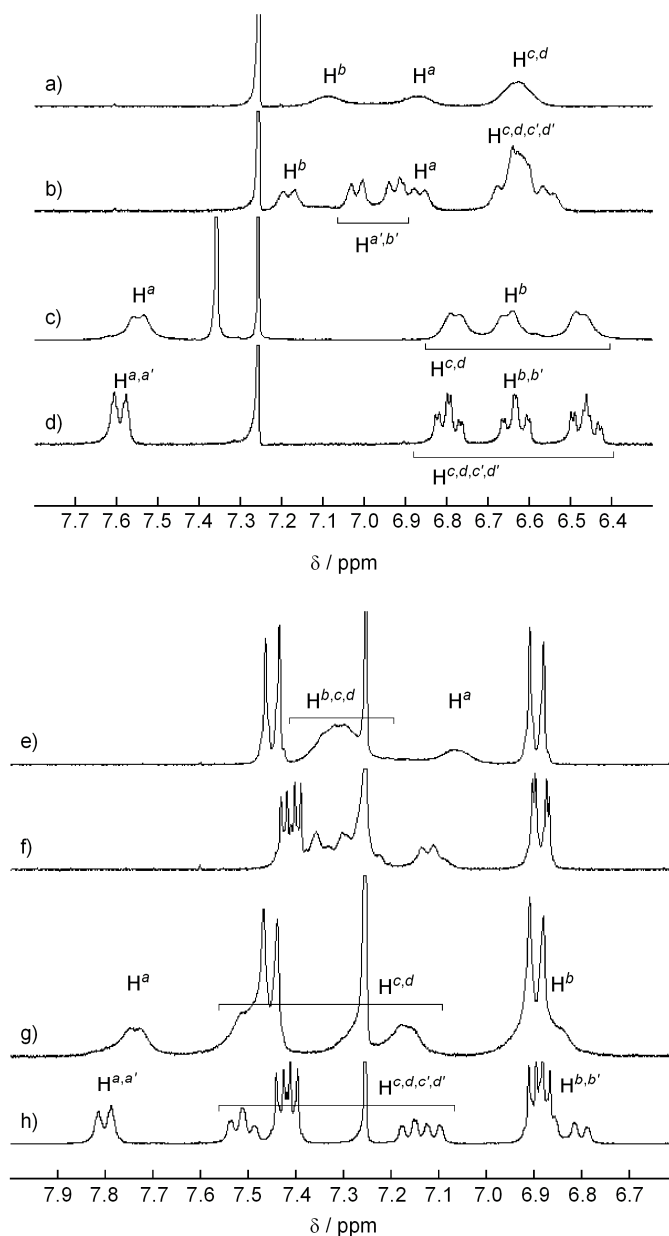

**Fig. S2** Aromatic region in  $^1\text{H}$  NMR spectra (300 MHz) for a) *syn-1a*, b) *(R,R)*-*syn-1b*, c) *anti-1a*, d) *(R,R)*-*anti-1b*, e) *syn-2a*, f) *(R,R)*-*syn-2b*, g) *anti-2a*, and h) *(R,R)*-*anti-1b* measured in  $\text{CDCl}_3$  at room temperature.

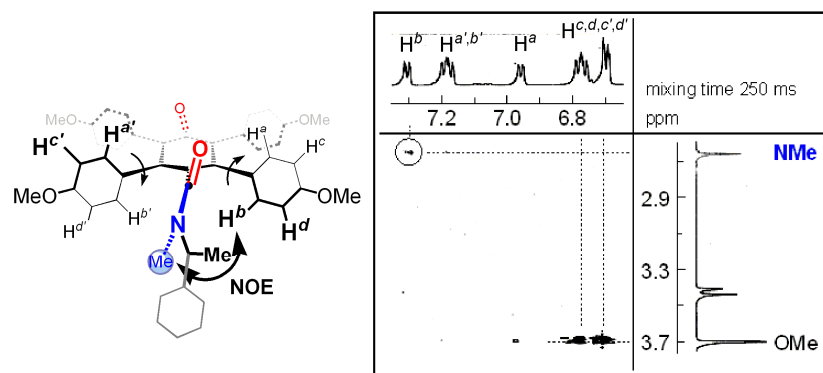

**Fig. S3** 2D-ROESY spectrum of *(R,R)*-syn-**1b** measured in acetone- $d_6$  at 223 K (600 MHz).

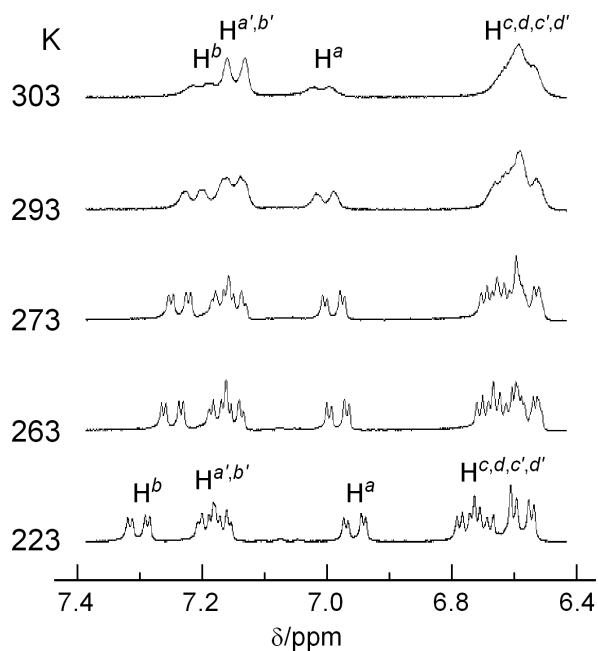

**Fig. S4** Aromatic region in  $^1H$  NMR spectra (300 MHz) for *(R,R)*-syn-**1b** measured in acetone- $d_6$  upon raising temperature from 223 to 303 K.

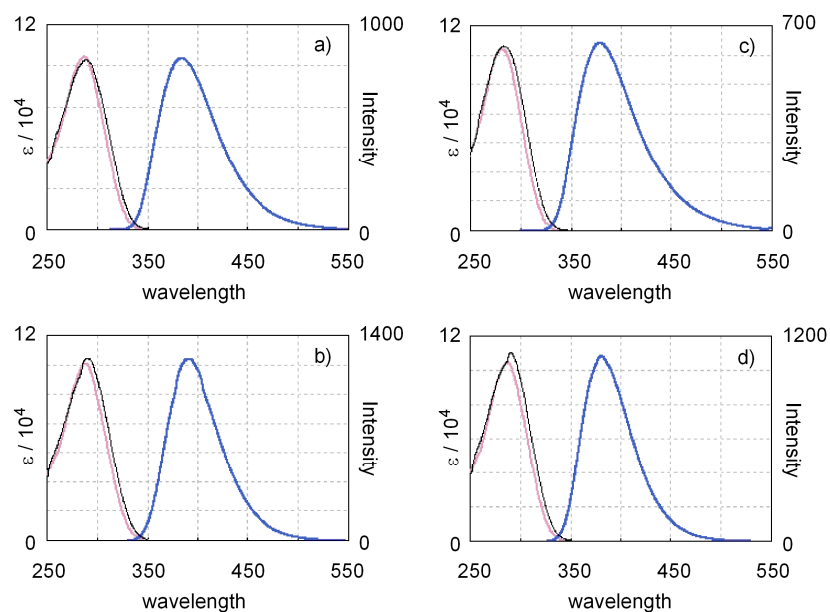

**Fig. S5** Absorption (pink), fluorescence emission (blue) and fluorescence excitation (black) spectra of a) *syn-2a*, b) *anti-2a*, c) *(R,R)-syn-2b*, and d) *(R,R)-anti-2b* measured in  $\text{CH}_2\text{Cl}_2$  at room temperature. The solutions of  $10^{-5}$  M (for UV and CD) and of  $10^{-6}$  M (for fluorescence) were used for the measurement.

**Table S1** UV and CD spectral data of **1a/2a** and *(R,R)-5b* in  $\text{CH}_2\text{Cl}_2$  at room temperature.

|                                                   | <b>syn-1a</b> | <b>anti-1a</b> | <b>syn-2a</b> | <b>anti-2a</b> | <b>syn-5b</b>         | <b>anti-5b</b>        |
|---------------------------------------------------|---------------|----------------|---------------|----------------|-----------------------|-----------------------|
| $\lambda_{\text{max}} / \text{nm}$                | 256           | 260            | 287           | 289            | [250]                 | [250]                 |
| (log $\epsilon$ )                                 | (4.62)        | (4.60)         | (5.00)        | (5.01)         | (4.16 <sup>b</sup> )  | (4.15 <sup>b</sup> )  |
| $\lambda_{\text{max}} / \text{nm}$                | -             | -              | -             | -              | [250]                 | [250]                 |
| ( $\Delta\epsilon$ )                              | -             | -              | -             | -              | (-3.60 <sup>c</sup> ) | (-2.66 <sup>c</sup> ) |
| $\lambda_{\text{max, em}}^{\text{a}} / \text{nm}$ | -             | -              | 384           | 390            | -                     | -                     |

a: Excited at each absorption maximum.

b: The value of log  $\epsilon$  at 250 nm, it diminishes gradually toward 0 at ca. 310 nm, the end of absorption.

c: The value of  $\Delta\epsilon$  at 250 nm, it increases gradually toward 0 at around 280 nm.

## Experimental

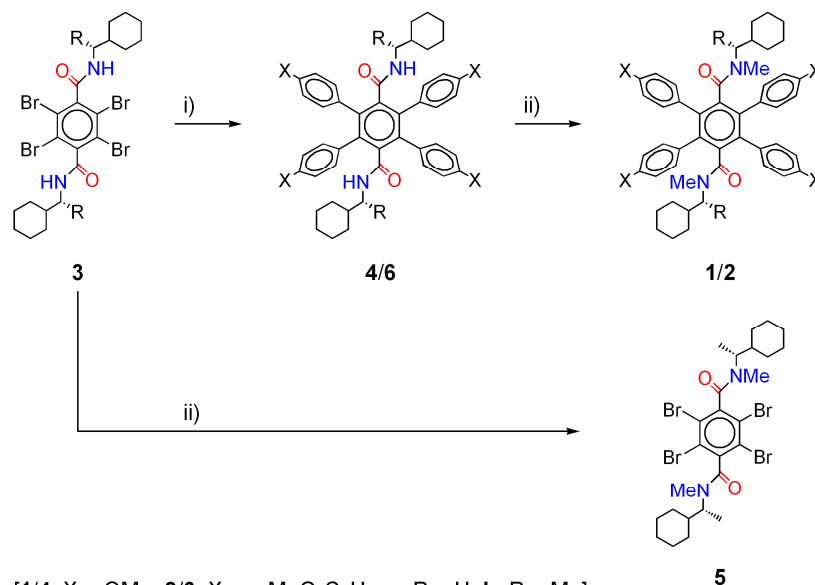

Reagents i) ArB(OH)<sub>2</sub>, Pd(PPh<sub>3</sub>)<sub>4</sub>, Na<sub>2</sub>CO<sub>3</sub> in DME/toluene, ii) NaH, CH<sub>3</sub>I in THF.

## Preparation of achiral 1a

To a solution of **4a** (160 mg, 0.205 mmol) and iodomethane (380  $\mu$ L, 6.10 mmol) in THF (30 mL) was added 60% NaH in oil (50 mg, 1.25 mmol), and the mixture was refluxed for 74 h. The solution was diluted with ethyl acetate, and was washed with 1N HCl aq., sodium thiosulfate aq., and brine. The organic layer was dried over MgSO<sub>4</sub>. Chromatographic separation on preparative TLC plates (SiO<sub>2</sub>, 1 mm thickness, 10% ethylacetate/CHCl<sub>3</sub>) gave 43 mg of syn-**1a** and 86 mg of anti-**1a** in 26% and 52% yields, respectively. Analytical samples of syn-**1a** and anti-**1a** were obtained by recrystallization from ethyl acetate and ethyl acetate/benzene, respectively.

### Data of syn-**1a**

mp 280-281 °C; <sup>1</sup>H NMR  $\delta_{\text{H}}$ (300 MHz; CDCl<sub>3</sub>; TMS)/ppm 7.16-7.00 (4H, br), 6.94-6.80 (4H, br), 6.73-6.55 (8H, br), 3.708 (12H, s), 2.757 (6H, s), 2.680 (4H, d, *J* = 7.2 Hz), 1.59-1.41 (6H, m), 1.29-1.09 (2H, m), 1.41-0.84 (10H, m), 0.62-0.41 (4H, m); <sup>13</sup>C NMR  $\delta_{\text{C}}$ (75 MHz; CDCl<sub>3</sub>; TMS)/ppm 169.03 (C=O), 158.14 (C<sub>Ar</sub>-OMe), 138.33 (C<sub>Ar</sub>-CO), 137.52 (C<sub>Ar</sub>-Anisyl), 132.29 (C<sub>Ar</sub>, *meta* position to MeO), 130.68 (C<sub>Ar</sub>-Core), 130.19 (C<sub>Ar</sub>, *meta* position to MeO), 112.59 (C<sub>Ar</sub>, *ortho* position to MeO), 54.91 (MeO), 53.10 (CH<sub>2</sub>cHex), 37.89, 35.68, 30.56, 26.31, 25.82 (NMe, cHex×4); IR (KBr) 2921, 2848, 1639, 1629, 1612, 1515, 1247, 1179, 1033, 830, 561 cm<sup>-1</sup>; FD-MS *m/z* 808 (M<sup>+</sup>, BP), 809 ([M+1]<sup>+</sup>, 60.2%), 810 ([M+2]<sup>+</sup>, 21.0%); UV-Vis  $\lambda_{\text{max}}$ (CH<sub>2</sub>Cl<sub>2</sub>)/nm 256 (log $\epsilon$  4.62); FD-HRMS Calcd. for C<sub>52</sub>H<sub>60</sub>N<sub>2</sub>O<sub>6</sub> 808.4451, Found 808.4478.

### Data of anti-**1a**

mp 282-283 °C; <sup>1</sup>H NMR  $\delta_{\text{H}}$ (300 MHz; CDCl<sub>3</sub>; TMS)/ppm 7.65-7.45 (4H, br d), 6.86-6.72 (4H, br d), 6.72-6.56 (4H, br d), 6.55-6.41 (4H, br d), 3.708 (12H, s), 2.611 (4H, d, *J* = 7.5 Hz), 2.338 (6H, s),

1.55-1.30 (6H, m), 1.21-0.79 (12H, m), 0.54-0.31 (4H, m);  $^{13}\text{C}$  NMR  $\delta_{\text{C}}$ (75 MHz;  $\text{CDCl}_3$ ; TMS)/ppm 169.23 ( $\text{C}=\text{O}$ ), 158.14 ( $\text{C}_{\text{Ar}}\text{-OMe}$ ), 138.72 ( $\text{C}_{\text{Ar}}\text{-CO}$ ), 137.16 ( $\text{C}_{\text{Ar}}\text{-Anisyl}$ ), 132.37, 131.55 ( $\text{C}_{\text{Ar}}$ , *meta* position to  $\text{MeO}\times 2$ ), 130.49 ( $\text{C}_{\text{Ar}}\text{-Core}$ ), 112.75, 112.36 ( $\text{C}_{\text{Ar}}$ , *ortho* position to  $\text{MeO}\times 2$ ), 54.89 ( $\text{MeO}$ ), 52.86 ( $\text{CH}_2\text{cHex}$ ), 37.03, 35.46, 30.20, 26.33, 25.77 ( $\text{NMe}$ ,  $\text{cHex}\times 4$ ); IR (KBr) 2930, 2836, 1641, 1609, 1514, 1244, 1175, 1036, 832, 680  $\text{cm}^{-1}$ ; FD-MS  $m/z$  808 ( $\text{M}^+$ , BP), 809 ( $[\text{M}+1]^+$ , 36%), 810 ( $[\text{M}+2]^+$ , 17%); UV-Vis  $\lambda_{\text{max}}(\text{CH}_2\text{Cl}_2)/\text{nm}$  260 ( $\log\epsilon$  4.60); FD-HRMS Calcd. for  $\text{C}_{52}\text{H}_{60}\text{N}_2\text{O}_6$  808.4451, Found 808.4462.

### Preparation of (*R,R*)-**1b**

To a solution of (*R,R*)-**4b** (128 mg, 0.158 mmol) and iodomethane (0.30 mL, 4.8 mmol) in THF (23 mL) was added 60% NaH in oil (34 mg, 0.85 mmol), and the mixture was refluxed for 49 h. The solution was diluted with ethyl acetate, and was washed with 1N HCl aq., sodium thiosulfate aq., and brine. The organic layer was dried over  $\text{MgSO}_4$ . Chromatographic separation on preparative TLC plates ( $\text{SiO}_2$ , 1 mm thickness, 10% ethylacetate/ $\text{CHCl}_3$ ) gave 55 mg of (*R,R*)-syn-**1b** and 16 mg of (*R,R*)-anti-**1b** in 42% and 12% yields, respectively. An analytical sample of (*R,R*)-syn-**1b** was obtained by slow evaporation from acetone, and that of (*R,R*)-anti-**1b** was obtained by recrystallization from ethyl acetate/hexane, respectively.

#### Data of (*R,R*)-syn-**1b**

mp > 300  $^{\circ}\text{C}$ ;  $^1\text{H}$  NMR  $\delta_{\text{H}}$ (300 MHz;  $\text{CDCl}_3$ ; TMS)/ppm 7.23-7.14 (2H, br d), 7.06-6.98 (2H, br d), 6.97-6.90 (2H, br d), 6.90-6.82 (2H, br d), 6.74-6.49 (8H, br m), 3.854 (2H, dq,  $J = 6.6, 10.2$  Hz), 3.689 (6H, s), 3.684 (6H, s), 2.612 (6H, s), 1.63-1.25 (8H, m), 1.07-0.57 (10H, m), 0.423 (6H, d,  $J = 6.6$  Hz), 0.31-0.063 (4H, m);  $^{13}\text{C}$  NMR  $\delta_{\text{C}}$ (75 MHz;  $\text{CDCl}_3$ ; TMS)/ppm 168.91 ( $\text{C}=\text{O}$ ), 158.26, 158.12 ( $\text{C}_{\text{Ar}}\text{-OMe}\times 2$ ), 138.44 ( $\text{C}_{\text{Ar}}\text{-CO}$ ), 137.64, 137.40 ( $\text{C}_{\text{Ar}}\text{-Anisyl}\times 2$ ), 132.41, 132.28, 130.72, 130.57, 130.12 ( $\text{C}_{\text{Ar}}$ , *meta* position to  $\text{MeO}\times 4$ ,  $\text{C}_{\text{Ar}}\text{-Core}\times 2$ ), 115.27, 112.78, 112.63, 112.47 ( $\text{C}_{\text{Ar}}$ , *ortho* position to  $\text{MeO}\times 4$ ), 55.06, 54.85 ( $\text{MeO}\times 2$ ), 52.23 ( $\text{CHMecHex}$ ), 39.53, 30.48, 29.71, 28.68, 26.16, 26.09, 25.70 ( $\text{NMe}$ ,  $\text{cHex}\times 6$ ), 14.31 ( $\text{CHMecHex}$ ); IR (KBr) 2919, 2847, 1614, 1517, 1247, 1177, 1107, 1033, 816, 554  $\text{cm}^{-1}$ ; FD-MS  $m/z$  836 ( $\text{M}^+$ , BP), 837 ( $[\text{M}+1]^+$ , 61%), 838 ( $[\text{M}+2]^+$ , 19%); UV-Vis  $\lambda_{\text{max}}(\text{CH}_2\text{Cl}_2)/\text{nm}$  249sh ( $\log\epsilon$  4.54); CD( $\text{CH}_2\text{Cl}_2$ )  $\lambda_{\text{max}}/\text{nm}$  ( $\Delta\epsilon$ ) 254 (-4.06), 291 (-7.67);  $[\alpha]_{\text{D}}^{23}$  -69.9 ( $c$  0.12 in  $\text{CHCl}_3$ ); FD-HRMS Calcd. for  $\text{C}_{54}\text{H}_{64}\text{N}_2\text{O}_6$  836.4764, Found 836.4736.

#### Data of (*R,R*)-anti-**1b**

mp > 300  $^{\circ}\text{C}$ ;  $^1\text{H}$  NMR  $\delta_{\text{H}}$ (300 MHz;  $\text{CDCl}_3$ ; TMS)/ppm 7.589 (4H, d,  $J = 8.4$  Hz), 6.814 (2H, dd,  $J = 2.4, 8.4$  Hz), 6.787 (2H, dd,  $J = 2.4, 8.4$  Hz), 6.655 (2H, dd,  $J = 2.4, 8.4$  Hz), 6.625 (2H, dd,  $J = 2.4, 8.4$  Hz), 6.488 (2H, dd,  $J = 2.4, 8.4$  Hz), 6.451 (2H, dd,  $J = 2.4, 8.4$  Hz), 3.881 (2H, dq,  $J = 6.6, 10.2$  Hz), 3.699 (6H, s), 3.686 (6H, s), 2.118 (6H, s), 1.55-1.35 (6H, m), 1.192 (2H, d,  $J = 13.2$  Hz), 0.99-0.88 (4H, m), 0.81-0.57 (6H, m), 0.180 (6H, d,  $J = 6.6$  Hz), 0.12- -0.1 (4H, m);  $^{13}\text{C}$  NMR  $\delta_{\text{C}}$ (75 MHz;  $\text{CDCl}_3$ ; TMS)/ppm 169.28 ( $\text{C}=\text{O}$ ), 158.25, 158.20 ( $\text{C}_{\text{Ar}}\text{-OMe}\times 2$ ), 138.95 ( $\text{C}_{\text{Ar}}\text{-CO}$ ), 137.22, 136.94 ( $\text{C}_{\text{Ar}}\text{-Anisyl}\times 2$ ), 132.70, 132.28, 131.68, 131.63, 130.58, 130.40 ( $\text{C}_{\text{Ar}}$ , *meta* position to  $\text{MeO}\times 4$ ,  $\text{C}_{\text{Ar}}\text{-Core}\times 2$ ), 113.19, 112.77, 112.54, 112.16 ( $\text{C}_{\text{Ar}}$ , *ortho* position to  $\text{MeO}\times 4$ ), 55.14, 54.85 ( $\text{MeO}\times 2$ ), 52.13 ( $\text{CHMecHex}$ ), 39.39, 29.74, 29.41,

28.27, 26.15, 26.09, 25.63 (NMe, cHex $\times$ 6), 14.48 (CHMecHex); IR (KBr) 2923, 2850, 1638, 1611, 1516, 1245, 1177, 1104, 1039, 830, 555 cm<sup>-1</sup>; FD-MS m/z 836 (M<sup>+</sup>, BP), 837 ([M+1]<sup>+</sup>, 65%); UV-Vis  $\lambda_{\max}$ (CH<sub>2</sub>Cl<sub>2</sub>)/nm 259 (log $\epsilon$  4.59); CD(CH<sub>2</sub>Cl<sub>2</sub>)  $\lambda_{\max}$ /nm ( $\Delta\epsilon$ ) 261 (-2.56), 291 (-0.608); [ $\alpha$ ]<sub>D</sub><sup>23</sup> +3.75 (*c* 0.057 in CHCl<sub>3</sub>); FD-HRMS Calcd. for C<sub>54</sub>H<sub>64</sub>N<sub>2</sub>O<sub>6</sub> 836.4764, Found 836.4758.

### Preparation of achiral 2a

To a solution of **6a** (109 mg, 0.100 mmol) and iodomethane (380  $\mu$ L, 6.10 mmol) in THF (20 mL) was added 60% NaH in oil (54 mg, 1.35 mmol), and the mixture was refluxed for 88 h. The solution was diluted with ethyl acetate, and was washed with 1N HCl aq., sodium thiosulfate aq., and brine. The organic layer was dried over MgSO<sub>4</sub>. Chromatographic separation on silica gel (CHCl<sub>3</sub>-ethyl acetate/CHCl<sub>3</sub>) and preparative TLC plates (SiO<sub>2</sub>, 1 mm thickness, 10% ethylacetate/CHCl<sub>3</sub>) gave 50 mg of syn-**2a** and 36 mg of anti-**2a** in 45% and 32% yields. Analytical samples of both isomers were obtained by reprecipitation with ethyl acetate and hexane.

#### Data of syn-**2a**

mp > 300 °C; <sup>1</sup>H NMR  $\delta_{\text{H}}$ (300 MHz; CDCl<sub>3</sub>; TMS)/ppm 7.451 (8H, d, *J* = 8.7 Hz), 7.40-7.26 (12H, br), 7.12-6.99 (4H, br), 6.900 (8H, d, *J* = 8.7 Hz), 3.815 (12H, s), 2.842 (6H, s), 2.696 (4H, d, *J* = 6.9 Hz), 1.43-1.14 (8H, m), 0.96 (4H, d, *J* = 11.7 Hz), 0.93-0.74 (6H, m), 0.58-0.42 (4H, m); <sup>13</sup>C NMR  $\delta_{\text{C}}$ (75 MHz; CDCl<sub>3</sub>; TMS)/ppm 168.82 (C=O), 158.98 (C<sub>Ar</sub>-OMe), 138.75, 137.07, 137.67, 136.54, 133.08, 131.55, 129.65, 127.83, 125.89, 124.58 (C<sub>Ar</sub> $\times$ 10), 114.02 (C<sub>Ar</sub>, *ortho* position to MeO), 55.29 (MeO), 53.09 (CH<sub>2</sub>cHex), 37.87, 35.49, 30.53, 26.25, 25.74 (NMe, cHex $\times$ 4); IR (KBr) 2921, 2847, 1632, 1610, 1500, 1247, 1178, 1108, 1039, 821, 621 cm<sup>-1</sup>; FD-MS m/z 1112 (M<sup>+</sup>, BP), 1113 ([M+1]<sup>+</sup>, 87%), 1114 ([M+2]<sup>+</sup>, 37%), 556 (M<sup>2+</sup>, 31%); UV-Vis  $\lambda_{\max}$ (CH<sub>2</sub>Cl<sub>2</sub>)/nm 287 (log $\epsilon$  5.00); Fluorescence  $\lambda_{\max, \text{em}}$ (CH<sub>2</sub>Cl<sub>2</sub>, excited at 287 nm) 384 nm; FD-HRMS Calcd. for C<sub>76</sub>H<sub>76</sub>N<sub>2</sub>O<sub>6</sub> 1112.5703, Found 1112.5730.

#### Data of anti-**2a**

mp > 300 °C; <sup>1</sup>H NMR  $\delta_{\text{H}}$ (300 MHz; CDCl<sub>3</sub>; TMS)/ppm 7.84-7.65 (4H, br), 7.59-7.40 (4H, br), 7.455 (8H, d, *J* = 8.7 Hz), 7.23-7.09 (4H, br), 7.01-6.79 (4H, br), 6.900 (8H, d, *J* = 8.7 Hz), 3.815 (12H, s), 2.624 (4H, d, *J* = 7.2 Hz), 2.425 (6H, s), 1.37-1.06 (8H, m), 0.93-0.66 (10H, m), 0.50-0.30 (4H, m); <sup>13</sup>C NMR  $\delta_{\text{C}}$ (75 MHz; CDCl<sub>3</sub>; TMS)/ppm 168.97 (C=O), 159.00 (C<sub>Ar</sub>-OMe), 138.69, 138.43, 137.40, 136.31, 133.02, 132.02-130.45, 127.81, 125.29-124.24 (C<sub>Ar</sub> $\times$ 8), 114.03 (C<sub>Ar</sub>, *ortho* position to MeO), 55.31 (MeO), 52.72 (CH<sub>2</sub>cHex), 36.92, 35.27, 30.13, 26.24, 25.71 (NMe, cHex $\times$ 4); IR (KBr) 2920, 2848, 1632, 1609, 1500, 1247, 1178, 1108, 1038, 823, 617 cm<sup>-1</sup>; FD-MS m/z 1112 (M<sup>+</sup>, BP), 1113 ([M+1]<sup>+</sup>, 85%), 1114 ([M+2]<sup>+</sup>, 40%), 556 (M<sup>2+</sup>, 21%); UV-Vis  $\lambda_{\max}$ (CH<sub>2</sub>Cl<sub>2</sub>)/nm 289 (log $\epsilon$  5.01); Fluorescence  $\lambda_{\max, \text{em}}$ (CH<sub>2</sub>Cl<sub>2</sub>, excited at 289 nm) 390 nm; FD-HRMS Calcd. for C<sub>76</sub>H<sub>76</sub>N<sub>2</sub>O<sub>6</sub> 1112.5703, Found 1112.5701.

### Preparation of (R,R)-**2b**

To a solution of (R,R)-**6b** (95 mg, 0.085 mmol), iodomethane (160  $\mu$ L, 2.56 mmol) in THF (20 mL) was added 60% NaH in oil, and the mixture was refluxed for 52 h. The solution was diluted with ethyl acetate, and was washed with 1N HCl aq., sodium thiosulfate aq., and brine. The organic layer was dried over



MgSO<sub>4</sub>. Chromatographic separation on preparative TLC plates (SiO<sub>2</sub>, 1 mm thickness, 10% ethyl acetate/CHCl<sub>3</sub>) gave 39 mg of (*R,R*)-syn-**2b** and 19 mg of (*R,R*)-anti-**2b** in 40% and 20% yields, respectively.

Data of (*R,R*)-syn-**2b**

mp > 300 °C; <sup>1</sup>H NMR δ<sub>H</sub>(300 MHz; CDCl<sub>3</sub>; TMS)/ppm 7.419 (4H, d, *J* = 8.7 Hz), 7.406 (4H, d, *J* = 8.7 Hz), 7.38-7.19 (12H, br m), 7.19-7.04 (4H, br), 6.894 (4H, d, *J* = 8.7 Hz), 6.888 (4H, d, *J* = 8.7 Hz), 3.94-3.77 (2H, m), 3.890 (12H, s), 2.701 (6H, s), 1.62-1.22 (6H, br m), 1.17-0.52 (12H, br m), 0.354 (6H, d, *J* = 6.6 Hz), 0.43-0.28 (2H, m), 0.25-0.07 (2H, m); <sup>13</sup>C NMR δ<sub>C</sub>(75 MHz; CDCl<sub>3</sub>; TMS)/ppm 168.67 (C=O), 159.00, 158.94 (C<sub>Ar</sub>-OMe×2), 138.16 (C<sub>Ar</sub>-CO), 138.94, 138.89, 137.69, 137.44, 136.39, 136.33, 133.37, 133.20, 131.72, 131.54, 130.06, 129.68, 127.92, 127.83, 126.06, 124.60 (C<sub>Ar</sub>×18), 114.04, 114.01 (C<sub>Ar</sub>, *ortho* position to MeO×2), 55.32, 55.29 (MeO×2), 52.36 (CHMecHex), 39.50, 30.61, 29.69, 28.69, 26.08, 25.96, 25.71 (NMe, cHex×6), 14.15 (CHMecHex); IR (KBr) 2927, 2848, 1624, 1611, 1500, 1247, 1177, 1109, 1039, 813, 617 cm<sup>-1</sup>; FD-MS *m/z* 1140 (M<sup>+</sup>, BP), 1141 ([M+1]<sup>+</sup>, 82%), 1142 ([M+2]<sup>+</sup>, 39%), 570 (M<sup>2+</sup>, 22%); UV-Vis λ<sub>max</sub>(CH<sub>2</sub>Cl<sub>2</sub>)/nm 282 (logε 5.02); Fluorescence λ<sub>max,em</sub>(CH<sub>2</sub>Cl<sub>2</sub>, excited at 282 nm) 379 nm; CD(CH<sub>2</sub>Cl<sub>2</sub>) λ<sub>max</sub>/nm (Δε) 286 (-10.0), 312 (+1.04); [α]<sub>D</sub><sup>24</sup> -49.4 (*c* 0.050 in CHCl<sub>3</sub>); FD-HRMS Calcd. for C<sub>78</sub>H<sub>80</sub>N<sub>2</sub>O<sub>6</sub> 1140.6016, Found 1140.6033.

Data of (*R,R*)-anti-**2b**

mp > 300 °C; <sup>1</sup>H NMR δ<sub>H</sub>(300 MHz; CDCl<sub>3</sub>; TMS)/ppm 7.86-7.72 (4H, br d), 7.56-7.50 (2H, br d), 7.53-7.47 (2H, br d), 7.429 (4H, d, *J* = 8.7 Hz), 7.414 (4H, d, *J* = 8.7 Hz), 7.20-7.14 (2H, br d), 7.14-7.06 (2H, br d), 6.902 (4H, d, *J* = 8.7 Hz), 6.886 (4H, d, *J* = 8.7 Hz), 6.92-6.85 (2H, br d), 6.83-6.76 (2H, br d), 3.912 (2H, dq, *J* = 6.6, 9.9 Hz), 3.811 (12H, s), 2.197 (6H, s), 1.59-1.20 (6H, m), 1.00-0.42 (12H, m), 0.20-0.03 (4H, m), 0.127 (6H, d, *J* = 6.6 Hz); <sup>13</sup>C NMR δ<sub>C</sub>(75 MHz; CDCl<sub>3</sub>; TMS)/ppm 168.98 (C=O), 159.06, 158.94 (C<sub>Ar</sub>-OMe×2), 138.93, 138.88, 138.75, 137.43, 137.11, 136.37, 136.21, 133.22, 132.09, 131.70, 130.95, 130.88, 127.86, 127.83, 125.58, 125.52, 125.28, 125.18 (C<sub>Ar</sub>×19), 114.09, 113.99 (C<sub>Ar</sub>, *ortho* position to MeO×2), 55.32, 55.28 (MeO×2), 52.19 (CHMecHex), 39.41, 29.74, 29.49, 28.18, 26.02, 25.96, 25.61 (NMe, cHex×6), 14.23 (CHMecHex); IR (KBr) 2930, 2849, 1630, 1610, 1500, 1247, 1178, 1105, 1040, 822, 620 cm<sup>-1</sup>; FD-MS *m/z* 1140 (M<sup>+</sup>, BP), 1141 ([M+1]<sup>+</sup>, 86%), 1142 ([M+2]<sup>+</sup>, 39%), 570 (M<sup>2+</sup>, 20%); UV-Vis λ<sub>max</sub>(CH<sub>2</sub>Cl<sub>2</sub>)/nm 287 (logε 5.02); Fluorescence λ<sub>max,em</sub>(CH<sub>2</sub>Cl<sub>2</sub>, excited at 287 nm) 381 nm; CD(CH<sub>2</sub>Cl<sub>2</sub>) λ<sub>max</sub>/nm (Δε) 256 (-1.38), 272 (+2.11), 286 (-1.18), 304 (+1.43); [α]<sub>D</sub><sup>23</sup> -1.71 (*c* 0.041 in CHCl<sub>3</sub>); FD-HRMS Calcd. for C<sub>78</sub>H<sub>80</sub>N<sub>2</sub>O<sub>6</sub> 1140.6016, Found 1140.5992.

### Preparation of achiral **3a**

A mixture of 2,3,5,6-tetrabromoterephthalic acid (3.20 g, 6.64 mmol), benzyltriethylammonium chloride (36 mg, 0.16 mmol) and thionyl chloride (25 mL) was refluxed for 3.5 h under an argon atmosphere. After removal of thionyl chloride by evaporation, the remaining solid was dissolved in THF (100 mL). To a solution of cyclohexylmethylamine (1.73 mL, 13.3 mmol) and triethylamine (1.86 mL, 13.4 mmol) in THF (10 mL) was added the THF solution of the acid chloride via cannula. The mixture was stirred at room temperature for 22 h and then refluxed for 1 h. After pouring the mixture into water, white

precipitates were collected by filtration to give 4.41 g of **3a** as a white solid in 99% yield.

mp > 300 °C; <sup>1</sup>H NMR δ<sub>H</sub>(300 MHz; DMSO-*d*<sub>6</sub>; TMS)/ppm 8.67-8.46 (2H, m), 3.13-2.97 (4H, m), 1.87-0.70 (22H, br. m). The low resolution of the spectrum is due to low solubility in organic solvents.; IR (KBr) 3276, 3088, 2919, 2849, 1664, 1642, 1563, 1448, 1328, 1304, 1270, 690, 525 cm<sup>-1</sup>; FD-MS *m/z* 83 ([C<sub>6</sub>H<sub>11</sub>]<sup>+</sup>, 80%), 670 ([M+2]<sup>+</sup>, 71%), 672 ([M+4]<sup>+</sup>, BP), 674 ([M+6]<sup>+</sup>, 72%); FD-HRMS Calcd. for C<sub>22</sub>H<sub>28</sub>Br<sub>4</sub>N<sub>2</sub>O<sub>2</sub> 667.8884, Found 667.8884.

### Preparation of (*R,R*)-**3b**

A mixture of 2,3,5,6-tetrabromoterephthalic acid (3.16 g, 6.56 mmol), benzyltriethylammonium chloride (36 mg, 0.16 mmol) and thionyl chloride (25 mL) was refluxed for 2.5 h under an argon atmosphere. After removal of thionyl chloride by evaporation, the remaining solid was dissolved in THF (60 mL). To a solution of (*R*)-1-cyclohexylethylamine (1.95 mL, 13.1 mmol) and triethylamine (1.90 mL, 13.7 mmol) in THF (10 mL) was added the THF solution of the acid chloride via cannula. The mixture was stirred at 45 °C for 20.5 h. After removal of the solvent, the remaining solid was suspended in water and filtrated to give 4.40 g of (*R,R*)-**3b** as a white solid in 96% yield.

mp > 300 °C; <sup>1</sup>H NMR δ<sub>H</sub>(300 MHz; DMSO-*d*<sub>6</sub>; TMS)/ppm 8.422 (2H, d, *J* = 8.4 Hz), 3.83-3.64 (2H, m), 1.91-0.91 (24H, m), 1.091 (6H, d, *J* = 6.6 Hz); <sup>13</sup>C NMR δ<sub>C</sub>(75 MHz; DMSO-*d*<sub>6</sub>; TMS)/ppm 164.75 (C=O), 143.71 (C<sub>Ar</sub>-CO), 123.31, 122.87 (C<sub>Ar</sub>-Br×2), 49.90 (CHMecHex), 42.54, 29.23, 29.13, 26.50, 26.20, 26.15, (cHex×6), 17.35 (CHMecHex); IR (KBr) 3426, 3256, 3071, 2923, 2852, 1649, 1552, 1448, 1328, 1308, 1262, 535 cm<sup>-1</sup>; FD-MS *m/z* 83 ([C<sub>6</sub>H<sub>11</sub>]<sup>+</sup>, BP), 698 ([M+2]<sup>+</sup>, 33%), 700 ([M+4]<sup>+</sup>, 48%), 702 ([M+6]<sup>+</sup>, 30%); UV-Vis λ<sub>250nm</sub>(CH<sub>2</sub>Cl<sub>2</sub>) logε 4.07; CD(CH<sub>2</sub>Cl<sub>2</sub>) λ<sub>250</sub> Δε -2.04; [α]<sub>D</sub><sup>21</sup> -9.12 (*c* 0.024 in CHCl<sub>3</sub>); FD-HRMS Calcd. for C<sub>24</sub>H<sub>32</sub>Br<sub>4</sub>N<sub>2</sub>O<sub>2</sub> 695.9197, Found 695.9179.

### Preparation of achiral **4a**

To a suspension of **3a** (670 mg, 1.00 mmol), 4-methoxyboronic acid (912 mg, 6.00 mmol) and 2M Na<sub>2</sub>CO<sub>3</sub> aq. (12 mL, 24.0 mmol) in dimethoxyethane (DME) (40 mL) and toluene (10 mL) was added Pd(PPh<sub>3</sub>)<sub>4</sub> (240 mg, 0.208 mmol) under an argon atmosphere, and the mixture was refluxed for 68 h. After removal of precipitates by filtration with celite and evaporation of the solvent, the remaining solid was dissolved in CHCl<sub>3</sub> and washed with 5% NaOH aq., 10% HCl aq. and satd. NaHCO<sub>3</sub> aq. The organic layer was dried over MgSO<sub>4</sub>. Chromatographic separation on silica gel (CHCl<sub>3</sub>) gave 695 mg of **4a** as a white solid in 89% yield. An analytical sample was obtained by gel permeation chromatography (GPC, CHCl<sub>3</sub>, detected by UV 254 nm) and recrystallization from ethyl acetate.

mp 279-280 °C; <sup>1</sup>H NMR δ<sub>H</sub>(300 MHz; CDCl<sub>3</sub>; TMS)/ppm 7.046 (8H, d, *J* = 8.4 Hz), 6.647 (8H, d, *J* = 8.4 Hz), 5.082 (2H, t, *J* = 6.3 Hz), 3.702 (12H, s), 1.57-1.36 (6H, br m), 1.17-0.74 (12H, br m), 0.56-0.33 (4H, br m); <sup>13</sup>C NMR δ<sub>C</sub>(75 MHz; CDCl<sub>3</sub>; TMS)/ppm 168.46 (C=O), 158.17 (C<sub>Ar</sub>-OMe), 139.63 (C<sub>Ar</sub>-CO), 137.85 (C<sub>Ar</sub>-Anisyl), 131.59, 130.62 (C<sub>Ar</sub>, *meta* position to MeO, C<sub>Ar</sub>-Core), 112.73 (C<sub>Ar</sub>, *ortho* position to MeO), 54.95 (MeO), 45.23 (CH<sub>2</sub>cHex), 37.33, 30.34, 26.21, 25.70 (cHex×4); IR (KBr) 3371, 2920, 2850, 1658, 1639, 1612, 1517, 1247, 1178, 1107, 1033, 835, 810, 566, 541 cm<sup>-1</sup>; FD-MS *m/z* 780 (M<sup>+</sup>, BP), 781

( $[M+1]^+$ , 47%), 782 ( $[M+2]^+$ , 17%); UV-Vis  $\lambda_{\max}(\text{CH}_2\text{Cl}_2)/\text{nm}$  260 (log $\epsilon$  4.60); FD-HRMS Calcd. for  $\text{C}_{50}\text{H}_{56}\text{N}_2\text{O}_6$  780.4138, Found 780.4131.

### Preparation of (*R,R*)-**4b**

To a suspension of (*R,R*)-**3b** (700 mg, 1.00 mmol), 4-methoxyboronic acid (915 mg, 6.00 mmol) and 2M  $\text{Na}_2\text{CO}_3$  aq. (12 mL, 24.0 mmol) in DME (50 mL) was added  $\text{Pd}(\text{PPh}_3)_4$  (230 mg, 0.200 mmol) under an argon atmosphere, and the mixture was refluxed for 66 h. After removal of precipitates by filtration with celite and evaporation of the solvent, the remaining solid was dissolved in  $\text{CHCl}_3$  and washed with 5%  $\text{NaOH}$  aq., 10%  $\text{HCl}$  aq. and satd.  $\text{NaHCO}_3$  aq. The organic layer was dried over  $\text{MgSO}_4$ . Chromatographic separation on silica gel ( $\text{CHCl}_3$ ) gave 734 mg of (*R,R*)-**4b** as a white solid in 91% yield. An analytical sample was obtained by reprecipitation from ethyl acetate and hexane.

mp 286-287 °C;  $^1\text{H}$  NMR  $\delta_{\text{H}}$ (300 MHz;  $\text{CDCl}_3$ ; TMS)/ppm 7.18-6.95 (8H, br), 6.651 (8H, d,  $J = 8.7$  Hz), 4.756 (2H, d,  $J = 9.3$  Hz), 3.710 (12H, s), 3.41-3.28 (2H, m), 1.51-1.36 (6H, br m), 1.21-0.68 (12H, br m), 0.43-0.24 (4H, br m), 0.351 (6H, d,  $J = 6.6$  Hz);  $^{13}\text{C}$  NMR  $\delta_{\text{C}}$ (75 MHz;  $\text{CDCl}_3$ ; TMS)/ppm 167.59 ( $\text{C}=\text{O}$ ), 158.25 ( $\text{C}_{\text{Ar}}\text{-OMe}$ ), 139.81 ( $\text{C}_{\text{Ar}}\text{-CO}$ ), 137.74 ( $\text{C}_{\text{Ar}}\text{-Anisyl}$ ), 134.35, 131.82, 130.60 ( $\text{C}_{\text{Ar}}$ , meta position to MeO,  $\text{C}_{\text{Ar}}\text{-Core}$ ), 112.74, 112.67 ( $\text{C}_{\text{Ar}}$ , ortho position to MeO $\times 2$ ), 55.00 ( $\text{MeO}$ ), 49.02 ( $\text{CHMecHex}$ ), 42.40, 28.56, 27.80, 26.12, 25.99 ( $\text{cHex}\times 6$ ), 17.09 ( $\text{CHMecHex}$ ); IR (KBr) 3435, 3357, 2923, 2848, 1632, 1612, 1516, 1247, 1179, 1106, 1033, 828, 583, 540  $\text{cm}^{-1}$ ; FD-MS  $m/z$  808 ( $\text{M}^+$ , BP), 809 ( $[M+1]^+$ , 58%), 810 ( $[M+2]^+$ , 19%); UV-Vis  $\lambda_{\max}(\text{CH}_2\text{Cl}_2)/\text{nm}$  258 (log $\epsilon$  4.53); CD( $\text{CH}_2\text{Cl}_2$ )  $\lambda_{\max}/\text{nm}$  ( $\Delta\epsilon$ ) 256 (-3.68), 292 (-1.64);  $[\alpha]_{\text{D}}^{23}$  -10.9 ( $c$  0.072 in  $\text{CHCl}_3$ ); FD-HRMS Calcd. for  $\text{C}_{52}\text{H}_{60}\text{N}_2\text{O}_6$  808.4451, Found 808.4454.

### Preparation of (*R,R*)-**5b**

To a solution of (*R,R*)-**3b** (251 mg, 0.359 mmol) and iodomethane (600  $\mu\text{L}$ , 9.63 mmol) in DMF (6 mL) was added 60%  $\text{NaH}$  in oil (65 mg, 1.63 mmol), and the mixture was stirred at room temperature for 24.5 h. The mixture was diluted with ethyl acetate, and washed with 1N  $\text{HCl}$  aq., sodium thiosulfate aq., and brine. The organic layer was separated, and then dried over  $\text{MgSO}_4$ . Chromatographic separation on silica gel ( $\text{CHCl}_3$ ) and preparative TLC plates ( $\text{SiO}_2$ , 1 mm thickness,  $\text{CHCl}_3$ ) gave 120 mg of (*R,R*)-syn-**5b** and 76 mg of (*R,R*)-anti-**5b** in 46% and 29% yields.

#### Data of (*R,R*)-syn-**5b**

mp 219-220 °C;  $^1\text{H}$  NMR  $\delta_{\text{H}}$ (300 MHz;  $\text{CDCl}_3$ ; TMS)/ppm 4.521 (2H, dq,  $J = 6.6, 10.2$  Hz), 2.679 (6H, s), 1.96-1.57 (10H, br m), 1.57-1.37 (2H, br m), 1.37-0.94 (10H, br m), 1.229 (6H, d,  $J = 6.6$  Hz);  $^{13}\text{C}$  NMR  $\delta_{\text{C}}$ (75 MHz;  $\text{CDCl}_3$ ; TMS)/ppm 166.24 ( $\text{C}=\text{O}$ ), 142.54 ( $\text{C}_{\text{Ar}}\text{-CO}$ ), 122.96, 122.49 ( $\text{C}_{\text{Ar}}\text{-Br}\times 2$ ), 53.84 ( $\text{CHMecHex}$ ), 40.29, 30.20, 30.00, 29.46, 26.14, 25.98, 25.81 ( $\text{NMe}$ ,  $\text{cHex}\times 6$ ), 14.94 ( $\text{CHMecHex}$ ); IR (KBr) 2925, 2850, 1644, 1482, 1445, 1408, 1305, 1240, 1130, 537  $\text{cm}^{-1}$ ; FD-MS  $m/z$  83 ( $[\text{C}_6\text{H}_{11}]^+$ , 17%), 726 ( $[M+2]^+$ , 72%), 728 ( $[M+4]^+$ , BP), 730 ( $[M+6]^+$ , 69%); UV-Vis  $\lambda_{250\text{nm}}(\text{CH}_2\text{Cl}_2)$  log $\epsilon$  4.16; CD( $\text{CH}_2\text{Cl}_2$ )  $\lambda_{250}$   $\Delta\epsilon$  -3.60;  $[\alpha]_{\text{D}}^{22}$  -37.8 ( $c$  0.050 in  $\text{CHCl}_3$ ); FD-HRMS Calcd. for  $\text{C}_{26}\text{H}_{36}\text{Br}_4\text{N}_2\text{O}_2$  723.9510, Found 723.9534.

#### Data of (*R,R*)-anti-**5b**

mp 257-258 °C;  $^1\text{H}$  NMR  $\delta_{\text{H}}$ (300 MHz;  $\text{CDCl}_3$ ; TMS)/ppm 4.510 (2H, dq,  $J = 6.6, 10.2$  Hz), 2.667 (6H, s), 1.95-1.60 (10H, br m), 1.54-1.37 (2H, br m), 1.36-0.96 (10H, br m), 1.227 (6H, d,  $J = 6.6$  Hz);  $^{13}\text{C}$  NMR  $\delta_{\text{C}}$ (75 MHz;  $\text{CDCl}_3$ ; TMS)/ppm 166.60 ( $\text{C}=\text{O}$ ), 142.56 ( $\text{C}_{\text{Ar}}-\text{CO}$ ), 122.99, 122.78 ( $\text{C}_{\text{Ar}}-\text{Br}\times 2$ ), 53.94 ( $\text{CHMeHex}$ ), 40.28, 30.20, 30.01, 29.60, 26.14, 25.99, 25.81 (NMe,  $\text{cHex}\times 6$ ), 15.00 ( $\text{CHMeHex}$ ); IR (KBr) 2921, 2850, 1647, 1482, 1446, 1411, 1320, 1242, 1132, 731, 532  $\text{cm}^{-1}$ ; FD-MS  $m/z$  83 ( $[\text{C}_6\text{H}_{11}]^+$ , 19%), 726 ( $[\text{M}+2]^+$ , 73%), 728 ( $[\text{M}+4]^+$ , BP), 730 ( $[\text{M}+6]^+$ , 70%); UV-Vis  $\lambda_{250\text{nm}}(\text{CH}_2\text{Cl}_2)$   $\log\epsilon$  4.15;  $\text{CD}(\text{CH}_2\text{Cl}_2)$   $\lambda_{250}$   $\Delta\epsilon$  -2.66;  $[\alpha]_{\text{D}}^{21}$  -32.3 ( $c$  0.041 in  $\text{CHCl}_3$ ); FD-HRMS Calcd. for  $\text{C}_{26}\text{H}_{36}\text{Br}_4\text{N}_2\text{O}_2$  723.9510, Found 723.9482.

### Preparation of achiral **6a**

To a suspension of **3a** (680 mg, 1.01 mmol), 4'-methoxybiphenyl-4-yl boroxin (1.26 g, 2.00 mmol) and 2M  $\text{Na}_2\text{CO}_3$  aq. (12 mL, 24.0 mmol) in DME (40 mL), toluene (20 mL) and ethanol (4 mL) was added  $\text{Pd}(\text{PPh}_3)_4$  (230 mg, 0.200 mmol) under an argon atmosphere, and the mixture was refluxed for 76 h. After removal of precipitates by filtration with celite and evaporation of the solvent, the remaining solid was dissolved in  $\text{CHCl}_3$  and washed with 5%  $\text{NaOH}$  aq., 10%  $\text{HCl}$  aq. and satd.  $\text{NaHCO}_3$  aq. The organic layer was dried over  $\text{MgSO}_4$ . Chromatographic separation on silica gel ( $\text{CHCl}_3$ ) gave 109 mg of **6a** as a white solid in 9.9% yield. An analytical sample was obtained by GPC ( $\text{CHCl}_3$ , detected by UV 254 nm) separation.

mp > 300 °C;  $^1\text{H}$  NMR  $\delta_{\text{H}}$ (300 MHz;  $\text{CDCl}_3$ ; TMS)/ppm 7.460 (8H, d,  $J = 8.7$  Hz), 7.343 (8H, d,  $J = 8.4$  Hz), 7.242 (8H, d,  $J = 8.4$  Hz), 6.910 (8H, d,  $J = 8.7$  Hz), 3.819 (12H, s), 2.583 (4H, t,  $J = 6.3$  Hz), 1.44-1.30 (6H, br m), 1.17-1.02 (4H, br m), 0.91-0.72 (8H, br m), 0.49-0.32 (4H, br m);  $^{13}\text{C}$  NMR  $\delta_{\text{C}}$ (75 MHz;  $\text{CDCl}_3$ ; TMS)/ppm 168.18 ( $\text{C}=\text{O}$ ), 159.07 ( $\text{C}_{\text{Ar}}-\text{OMe}$ ), 139.40 ( $\text{C}_{\text{Ar}}-\text{CO}$ ), 138.86, 138.08, 136.51, 133.10, 130.89, 127.88, 125.42 ( $\text{C}_{\text{Ar}}\times 7$ ), 114.08 ( $\text{C}_{\text{Ar}}$ , *ortho* position to MeO), 55.31 (MeO), 45.61 ( $\text{CH}_2\text{cHex}$ ), 37.19, 30.33, 26.12, 25.59 ( $\text{cHex}\times 4$ ); IR (KBr) 3358, 2921, 2850, 1665, 1659, 1639, 1633, 1608, 1501, 1249, 1178, 1039, 826, 808, 623  $\text{cm}^{-1}$ ; FD-MS  $m/z$  1084 ( $\text{M}^+$ , BP), 1085 ( $[\text{M}+1]^+$ , 81%), 1086 ( $[\text{M}+2]^+$ , 32%); UV-Vis  $\lambda_{\text{max}}(\text{CH}_2\text{Cl}_2)/\text{nm}$  287 ( $\log\epsilon$  4.99); Fluorescence  $\lambda_{\text{max,em}}(\text{CH}_2\text{Cl}_2)$ , excited at 287 nm) 389 nm; FD-HRMS Calcd. for  $\text{C}_{74}\text{H}_{72}\text{N}_2\text{O}_6$  1084.5390, Found 1084.5415.

### Preparation of (*R,R*)-**6b**

To a suspension of (*R,R*)-**3b** (700 mg, 1.00 mmol), 4'-methoxybiphenyl-4-yl boroxin (1.26 g, 2.00 mmol) and 2M  $\text{Na}_2\text{CO}_3$  aq. (12 mL, 24.0 mmol) in DME (50 mL) was added  $\text{Pd}(\text{PPh}_3)_4$  (220 mg, 0.190 mmol) under an argon atmosphere, and the mixture was refluxed for 89 h. After removal of precipitates by filtration with celite and evaporation of the solvent, the remaining solid was dissolved in  $\text{CHCl}_3$  and washed with 5%  $\text{NaOH}$  aq., 10%  $\text{HCl}$  aq. and satd.  $\text{NaHCO}_3$  aq. The organic layer was dried over  $\text{MgSO}_4$ . Chromatographic separation on silica gel ( $\text{CHCl}_3$ ) and reprecipitation from benzene and hexane gave 195 mg of (*R,R*)-**6b** as a white solid in 18% yield. An analytical sample was obtained by GPC ( $\text{CHCl}_3$ , detected by UV 254 nm) separation.

mp > 300 °C;  $^1\text{H}$  NMR  $\delta_{\text{H}}$ (300 MHz;  $\text{CDCl}_3$ ; TMS)/ppm 7.441 (8H, d,  $J = 8.7$  Hz), 7.40-7.22 (16H, br

m), 6.903 (8H, d,  $J = 8.7$  Hz), 4.843 (2H, d,  $J = 9.0$  Hz), 3.813 (12H, s), 3.45-3.27 (2H, m), 1.43-1.23 (6H, br d), 1.18-1.08 (2H, br d), 1.08-0.96 (2H, br d), 0.94-0.63 (8H, br m), 0.42-0.18 (4H, br m), 0.297 (6H, d,  $J = 6.6$  Hz);  $^{13}\text{C}$  NMR  $\delta_{\text{C}}$ (75 MHz;  $\text{CDCl}_3$ ; TMS)/ppm 167.31 ( $\underline{\text{C}}=\text{O}$ ), 159.03 ( $\underline{\text{C}}_{\text{Ar}}\text{-OMe}$ ), 139.58 ( $\underline{\text{C}}_{\text{Ar}}\text{-CO}$ ), 138.94, 137.90, 136.42, 133.19, 131.16, 127.85, 125.41 ( $\underline{\text{C}}_{\text{Ar}}\times 7$ ), 114.06 ( $\underline{\text{C}}_{\text{Ar}}$ , *ortho* position to MeO), 55.29 ( $\underline{\text{MeO}}$ ), 49.17 ( $\underline{\text{CHMecHex}}$ ), 42.40, 28.70, 27.73, 26.08, 25.91 ( $\underline{\text{cHex}}\times 6$ ), 16.96 ( $\underline{\text{CHMecHex}}$ ); IR (KBr) 3371, 2921, 2848, 1656, 1641, 1609, 1501, 1248, 1178, 1039, 820, 621, 518  $\text{cm}^{-1}$ ; FD-MS  $m/z$  1112 ( $\text{M}^+$ , BP), 1113 ( $[\text{M}+1]^+$ , 83%), 1114 ( $[\text{M}+2]^+$ , 37%); UV-Vis  $\lambda_{\text{max}}(\text{CH}_2\text{Cl}_2)/\text{nm}$  286 ( $\log\epsilon$  4.99); Fluorescence  $\lambda_{\text{max,em}}(\text{CH}_2\text{Cl}_2, \text{excited at } 286 \text{ nm})$  386 nm;  $\text{CD}(\text{CH}_2\text{Cl}_2)$   $\lambda_{\text{max}}/\text{nm}$  ( $\Delta\epsilon$ ) 254 (-3.29), 287 (+0.38), 284 (-0.43), 306 (+1.72);  $[\alpha]_{\text{D}}^{23}$  -4.78 ( $c$  0.041 in  $\text{CHCl}_3$ ); FD-HRMS Calcd. for  $\text{C}_{76}\text{H}_{76}\text{N}_2\text{O}_6$  1112.5703, Found 1112.5692.

### Details of X-ray Analyses

**Crystal data of syn-1a:** Single-crystalline sample was obtained by recrystallization from ethyl acetate.  $\text{C}_{52}\text{H}_{60}\text{N}_2\text{O}_6$ ,  $M = 809.06$ , colorless plate,  $0.40\times 0.05\times 0.03 \text{ mm}^3$ , triclinic  $P-1$ ,  $a = 6.200(4)$ ,  $b = 14.073(8)$ ,  $c = 25.764(15) \text{ \AA}$ ,  $\alpha = 74.34(3)^\circ$ ,  $\beta = 84.36(5)^\circ$ ,  $\gamma = 82.62(5)^\circ$ ,  $V = 2142(2) \text{ \AA}^3$ ,  $\rho_{\text{calcd}} (Z = 2) = 1.254 \text{ g cm}^{-3}$ . A total of 8329 unique data ( $2\theta_{\text{max}} = 54.2$ ) were measured at  $T = 153 \text{ K}$  by a Rigaku Mercury CCD apparatus (Mo  $\text{K}\alpha$  radiation,  $\lambda = 0.71069 \text{ \AA}$ ). Numerical absorption correction was applied ( $\mu = 0.81 \text{ cm}^{-1}$ ). The structure was solved by the direct method (SIR92) and refined by the full-matrix least-squares method on  $F^2$  with anisotropic temperature factors for non-hydrogen atoms. All the hydrogen atoms are located at the calculated positions. The final  $R$  and  $R_w$  values are 0.0972 and 0.089 for 2093 reflections with  $I > 2\sigma I$  and 602 parameters. Estimated standard deviations for syn-1a are 0.007-0.011  $\text{ \AA}$  for bond lengths and  $0.4\text{-}0.9^\circ$  for bond angles, respectively. CCDC 680695.

**Crystal data of anti-1a:** Single-crystalline sample was obtained by recrystallization from ethyl acetate/benzene.  $\text{C}_{58}\text{H}_{66}\text{N}_2\text{O}_6$ ,  $M = 887.17$ , colorless block,  $0.25\times 0.15\times 0.15 \text{ mm}^3$ , triclinic  $P-1$ ,  $a = 9.668(3)$ ,  $b = 11.144(4)$ ,  $c = 11.778(4) \text{ \AA}$ ,  $\alpha = 106.388(5)^\circ$ ,  $\beta = 96.224(5)^\circ$ ,  $\gamma = 100.015(5)^\circ$ ,  $V = 1182.0(7) \text{ \AA}^3$ ,  $\rho_{\text{calcd}} (Z = 1) = 1.246 \text{ g cm}^{-3}$ . A total of 5034 unique data ( $2\theta_{\text{max}} = 54.2$ ) were measured at  $T = 153 \text{ K}$  by a Rigaku Mercury CCD apparatus (Mo  $\text{K}\alpha$  radiation,  $\lambda = 0.71069 \text{ \AA}$ ). Numerical absorption correction was applied ( $\mu = 0.80 \text{ cm}^{-1}$ ). The structure was solved by the direct method (SIR92) and refined by the full-matrix least-squares method on  $F^2$  with anisotropic temperature factors for non-hydrogen atoms. All the hydrogen atoms are located at the calculated positions. The final  $R$  and  $R_w$  values are 0.0723 and 0.2246 for 2795 reflections with  $I > 2\sigma I$  and 332 parameters. Estimated standard deviations for anti-1a are 0.002-0.005  $\text{ \AA}$  for bond lengths and  $0.19\text{-}0.4^\circ$  for bond angles, respectively. CCDC 680697.

**Crystal data of (R,R)-syn-1b:** Single-crystalline sample was obtained by recrystallization from ethyl

acetate/hexane.  $C_{54}H_{64}N_2O_6$ ,  $M = 837.11$ , colorless block,  $0.50 \times 0.30 \times 0.30$  mm<sup>3</sup>, triclinic  $P1$ ,  $a = 6.305(2)$ ,  $b = 13.323(5)$ ,  $c = 13.959(5)$  Å,  $\alpha = 86.986(10)^\circ$ ,  $\beta = 81.092(9)^\circ$ ,  $\gamma = 85.727(9)^\circ$ ,  $V = 1154.1(7)$  Å<sup>3</sup>,  $\rho_{\text{calcd}}$  ( $Z = 1$ ) =  $1.204$  g cm<sup>-3</sup>. A total of 7239 unique data ( $2\theta_{\text{max}} = 54.2$ ) were measured at  $T = 153$  K by a Rigaku Mercury CCD apparatus (Mo  $K\alpha$  radiation,  $\lambda = 0.71069$  Å). Numerical absorption correction was applied ( $\mu = 0.77$  cm<sup>-1</sup>). The structure was solved by the direct method (SIR92) and refined by the full-matrix least-squares method on  $F^2$  with anisotropic temperature factors for non-hydrogen atoms. All the hydrogen atoms are located at the calculated positions. One of the cyclohexyl groups exhibits positional disorder by involving 20% of the ring-flipped counter part, whose population was also refined in the middle of least-square method. The final  $R$  and  $R_w$  values are 0.0430 and 0.1321 for 6810 reflections with  $I > 2\sigma I$  and 669 parameters. Estimated standard deviations for ( $R,R$ )-syn-**1b** are 0.002-0.02 Å for bond lengths and 0.16-1.9° for bond angles, respectively. The absolute configuration was determined by chemical correlation. The refined Flack parameter is 0.0(9). CCDC 680696.

**Crystal data of ( $R,R$ )-anti-**1b**:** Single-crystalline sample was obtained by recrystallization from acetone.  $C_{54}H_{64}N_2O_6$ ,  $M = 837.11$ , colorless block,  $0.15 \times 0.07 \times 0.03$  mm<sup>3</sup>, triclinic  $P1$ ,  $a = 6.930(4)$ ,  $b = 12.154(7)$ ,  $c = 13.995(9)$  Å,  $\alpha = 98.002(14)^\circ$ ,  $\beta = 92.728(12)^\circ$ ,  $\gamma = 93.553(11)^\circ$ ,  $V = 1163.1(12)$  Å<sup>3</sup>,  $\rho_{\text{calcd}}$  ( $Z = 1$ ) =  $1.195$  g cm<sup>-3</sup>. A total of 6376 unique data ( $2\theta_{\text{max}} = 55.0$ ) were measured at  $T = 153$  K by a Rigaku Mercury CCD apparatus (Mo  $K\alpha$  radiation,  $\lambda = 0.71069$  Å). Numerical absorption correction was applied ( $\mu = 0.77$  cm<sup>-1</sup>). The structure was solved by the direct method (SIR92) and refined by the full-matrix least-squares method on  $F^2$  with anisotropic temperature factors for non-hydrogen atoms. All the hydrogen atoms are located at the calculated positions. The final  $R$  and  $R_w$  values are 0.0699 and 0.1834 for 2736 reflections with  $I > 2\sigma I$  and 624 parameters. Estimated standard deviations for ( $R,R$ )-anti-**1b** are 0.009-0.018 Å for bond lengths and 0.7-1.6° for bond angles, respectively. The absolute configuration was determined by chemical correlation. The refined Flack parameter is -3(5). CCDC 380698.
